# Supplementary material for: When Cannabis sativa L. Turns Purple: Biosynthesis and Accumulation of Anthocyanins
Source: MDPI journal article supplement (doi:10.3390/antiox12071393), 2023-07-06
Supplement: s1 [file s1]

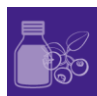

Supplementary Materials

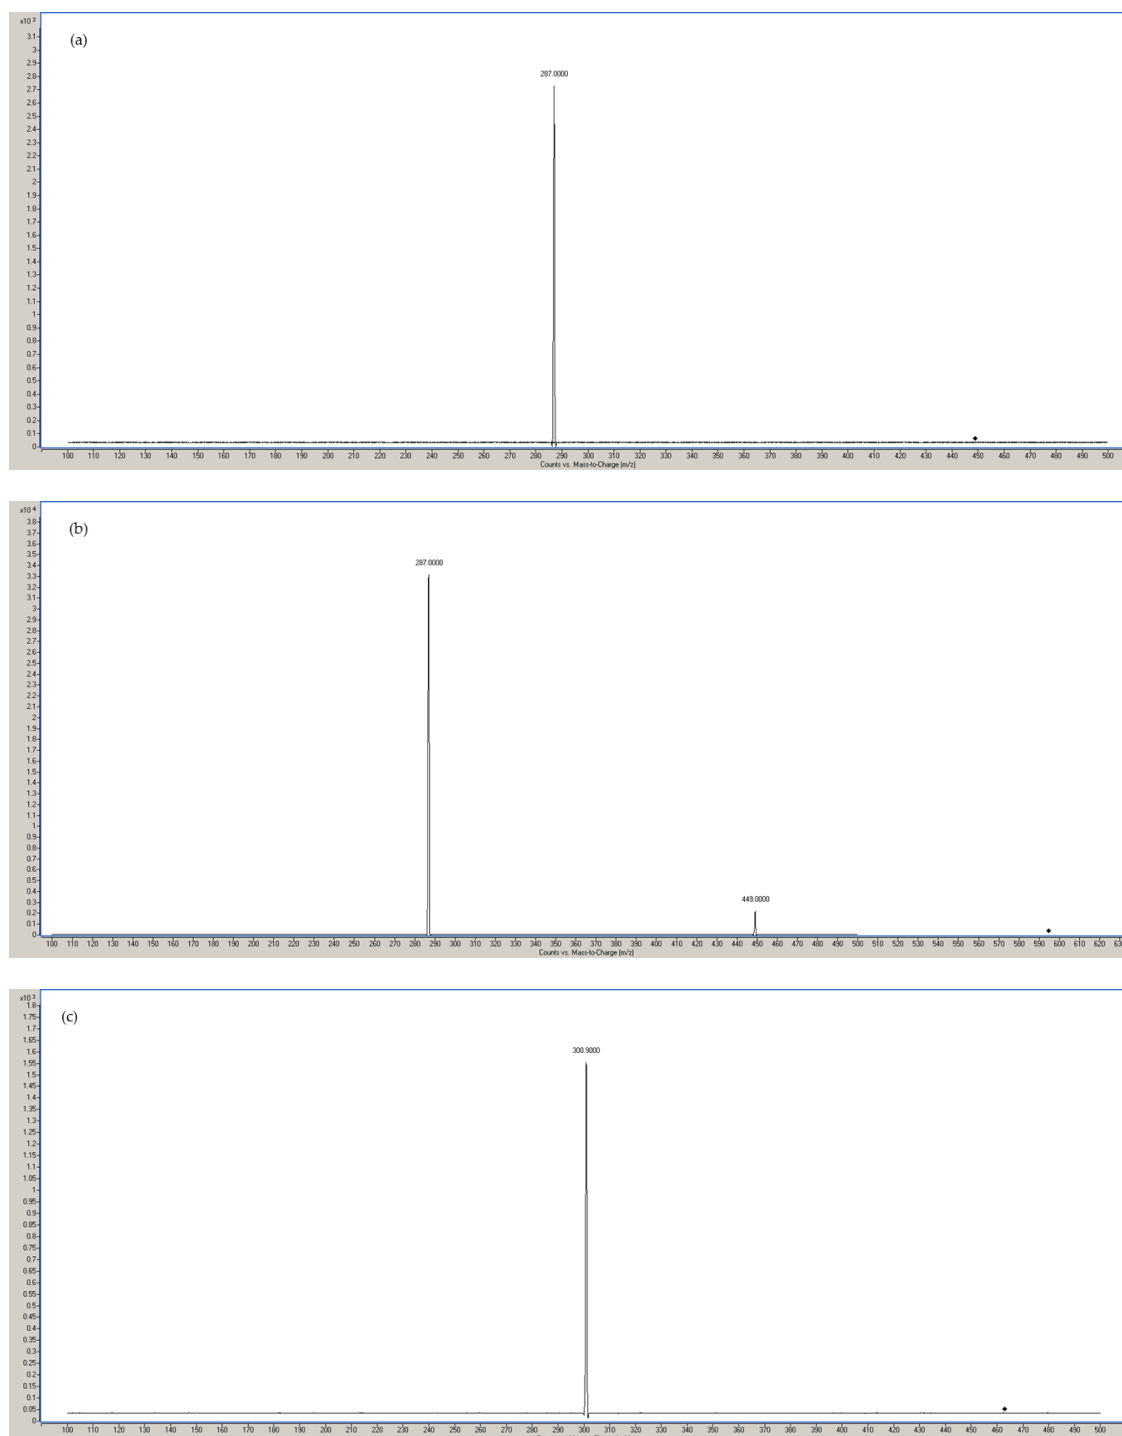

**Figure S1.** Mass spectra of the four identified peaks in *Cannabis* samples. Second-order mass spectra, obtained with ESI ionization in positive mode, of cyanidin 3-glucoside (peak 1), according to the standard mass spectra as reported by Olivas-Aguirre et al., 2016 (a), second-order mass spectra, obtained with ESI ionization in positive mode, of cyanidin 3-rutinoside (peak 2), according to the standard mass spectra as reported by de Rosso et al., 2008 (b), second-order mass spectra, obtained with ESI ionization in positive mode, of peonidin 3-glucoside (peak 3), according to the standard mass spectra as reported by Castañeda-Ovando et al. (2012) and De Pascual-Teresa et al. (2002)

(c), second-order mass spectra, obtained with ESI ionization in positive mode, of peonidin 3-rutino-side (peak 4) according to the standard mass spectra as reported by de Rosso et al. (2008) and Pra-dhan and Saha (2016).

**Table S1.** List of primer pairs used for RT-Qpcr. Forward (Fw) and reverse (Rv) primer sequences, the accession number of cs10 transcript used for primer design, amplicon length expressed in base pairs (bp), PCR efficiency (Eff) are given.

| Gene             | NCBI transcript | Primer sequences                                        | Effi | Amplicon length |
|------------------|-----------------|---------------------------------------------------------|------|-----------------|
| <i>CsF3'H</i>    | XM_030637390.1  | FW:CGACACATCATCAAGCACAGT<br>RV:CAGCATCACTTACAAGCCTATCTC | 0.85 | 125 bp          |
| <i>CsF3'5'H</i>  | XM_030644276.1  | FW:ATTGCGTGTACATCCACCTG<br>RV:GGATTTTCCCAAAGGCTAGG      | 1.07 | 147 bp          |
| <i>CsANS</i>     | XM_030645652.1  | FW: GCAATGTTTTTCGAGGAGGAG<br>RV: TCAACTCCTCTCGGCATTTC   | 1.34 | 114 bp          |
| <i>CsDFR</i>     | XM_030638485.1  | Fw:TTCTCCACCTCGGTTACA<br>Rv:TCAGCCTTCCACAGAGTA          | 1    | 118 bp          |
| <i>CsOMT</i>     | XM_030640905.1  | Fw:ACACGAGCAGTTGAAGGAGC<br>Rv:TGTCCTTCATCCACAGGCAC      | 1.46 | 87 bp           |
| <i>CsDTX35</i>   | XM_030648430.1  | Fw:CAATCTTAACGGGTGGGAAG<br>Rv:TTGGACGTTTCTACCAAGC       | 1.64 | 92 bp           |
| <i>Cs3GT</i>     | XM_030645093.1  | Fw:CCGAGATTGGGAAGGAGGTG<br>Rv:AAGGCCCAGCAGTCCAAAAT      | 1.54 | 114 bp          |
| <i>CsTTG1</i>    | XM_030645708.1  | Fw:ATAGCTTGGGTGAAGCAAG<br>Rv:AGCAAAGGGGTATCAGTTG        | 1.18 | 128 bp          |
| <i>CsMYB82</i>   | XM_030636983.1  | Fw:ACCAGGAAGGACAGCCAATG<br>Rv:AGGTCCGAGGACGAGGTTTA      | 1.21 | 167 bp          |
| <i>CsMYB87</i>   | XM_030622841.1  | FW: CGTGGAGAATTTGAGGAGGAC<br>RV: TCTACCGCAATCAATGACC    | 1.45 | 87 bp           |
| <i>CsbHLH112</i> | XM_030646090.1  | FW:GCCACTTCATCAGACAAC<br>RV: CTCCTCATCCTCTTCTTCAT       | 1.47 | 165 bp          |
| <i>CsbHLH114</i> | XM_030630819.1  | FW:GCCACTTCATCAGACAAC<br>RV:CTCCTCATCCTCTTCTTCAT        | 1.27 | 162 bp          |

**Table S2.** Amino acid sequences used for Neighbour-Joining phylogenetic analysis reported in Figure 2.

```

>XP030500158.1
MAAEEAAAVPLLTENTGPEEEDKDYEAVVSVRDVRNVFWKESVKLWTIAGPIICTIVCNY
GINSLTNIFVGHIGELQLSAVTISLSVIGTFSGFMLGMGSALETLCGQAFGAGQVHMLG
IYMQRSWLILLVSCFFLLPFYIFAAPILKILGQADDVADLAGKFTILVIPQLFSLAVNFP
TQKFLQAQSKVNALAWIGFVAMVLHVGLLWLFYFFNWGLTGA AVAFDLTSWLIVIAQVV
YVICWCNEGWSGFSMLAFKELWAFVRLSLASAVMLCLEIWYLM SVIVLTGHLKNAVIAVD
SLSVCMNLNGWEAMLFIGINAAISVRVSNELGMGRPLGAKYSVYVTVFQSLIGIFFAVV
ILLTKDDFSVIFTNSKEVQEA VSRLAYLLGITMLLSNVQPVISGVAIGGGWQALVAYINL
GCYYIFGLPLGVLLGYTAGLGVI GLWGGMICGTALQTLLLLIVLYKTNWNKEVEQTTERM
RLWAGQDVIEKPADQHI
>XP030487544.1
MPPESTITAIAFEIECVFSEWSKRNAKQTKEKGLALFLYYYHYNKTKSVKIGNKRKENE
VLKLEEEEDGEERRRSSASSSSSSSVLLSSTTLITSSSSSPSPPPSYSKGVNGFDGV
SILESAELQYAPTGVVGSTDDGDGDNDKDYPAITNFHDAKTIFIVESSKLWTIACPIAF
NIWCNNGINSFTNIFVGHGLGDVELSAVAISLSVIANFSGFLLGMGSALETLCGQAFGAG
QVDMLGVYMQRSWIILFTACFFLLPLYIFSTPILKLLGQEDQIAELAGKFTIQIIPQMFS
LAINFPTQKFLQAQSKVTILAWVVGFGALIMHTGILYLFKVFWDWGTGAAAAYDISAWAV

```

AIAQVVYIVGGCQDGWKGLSWLAFKDMWAFVKLSVASAVMLCLEIWYFMTIIVLTGHLED  
PIIavgSLsICMNINGWEGMLFIGVNA AISVRVSNELGSGHPRAAKYTVIVTCVEALCIG  
ILCAMLILLTKDHFaiIFTDSKEMQEAVSRLAFLLGITMVLNSVQPVISGVA VGGGWQAL  
VAYINLFCYYLIGLPLGFFLGYRTNLKVEGIWIGMICGTFLQTLILVYIIYKTNWTKEVE  
QASERLRGWTaqENGSDiIKV

>XP030504290.1

MDEPLLERTASEIVNGNINNHVSAEEGIINEDYSPARGFKELKTVFWLESKLWRIAGPA  
VVTIMCQYGTNSATSIFVGHLDIQLSAISISLGVVGTFSFGFMLGMGSALETLCGQAFG  
AGQVHMLGIYMQRSWILFSCILLTPYIFAGPILKLLGQNDEIADLAGQFSIQIIPQL  
FSLAFNFPaQKFLQSQSKFDVLAWISFLALIAHIGLLWLFYVLSLGTMGAAIAFNITRW  
GLCLAQIVYIMRCNEGWTGFSWLAFKDLWAFLKLSFASALMLCLEIWYIMSIYLLTGSL  
DNAVIAVGSLSICLNLNGWEGILFVGVNAAISVRVSNELGRKRPRAAKYSVYVTLFQALL  
IGLFFMIVVLVARQYLALIYTNDAALRKSVSHLAYLLGFTMLLNSVQQVISGVAIGGGWQ  
STVAYVNLGSYYIFGLPLGYVLGHYAGFGVMGLWGGMIIGIALQTLILSIILYRTNWTKE  
VEQSTERVREWGGEDTNDKATQDQI

>XP030499634.1

MEENNNNQPLLSSREENQNNHLETLLSTTSNHSFTADADDIQPINTVRDFYKEFKVESKK  
LWFLAGPAIFTSICQYSLGAITQVFAGHVSTIALAAVSVENSVIAGFSFGVMLGMGSALE  
TLCGQAFGAGQHDMGLIYMQRSWVILNSTGVILCFLYIFASKLLKLIGQTTEISEAAGLF  
AVWMIPQLFAYAMNFPiAKFLQAQSKMMVMaiISAVALVFHTFFSWLLILKLDWGMAGAA  
VVLNVSWWFIVVAQLAYIFSGTCGRAWSGFSKAFQNLWGFVRLSLASAVMLCLEVWYFM  
ALILFAGYLKNAKISVDALSICMNILGWTVMVALGINAAISVRVSNELGAAHPRTAKFSL  
VVAVISSFIIGLVLsiILIASRNEYPTLFSDDSDVETLVKKLTPVLATCILINNIQPVLS  
GVAIGAGWQAaVAYVNIVCYVFGVPLGLIMGYKLDMGVTGIWCGMLSGTVVQTCVLFEM  
VYKTNWNKEASVAEDRIRKWGGPDSKEDNDV

>XP030498661.1

MEDNRNPLLHSLGGGHGSRPTSASFTSSFTADGDDIQPINDVPSFFKEFTIETKKLWYIA  
GPAIFTSVCQYSLGAITQIFSGQLGTLELAaVSVQNFVISGFTFGVLLGMGSALETLCGQ  
AFGAGQLNMLGIYMQRSWIVLFVTGLILSLFYIFAEPIILLIGQTPEISKATGLYCLYVL  
PEIFAYALNFPITKFLQSQSKILVMSaiAAIALVLHTFFSWLFMLKLGWGLVGAaVVMNT  
SWWFIVVAQFIYILSGTCGEAWSGFSWKAfHNLWGFVKLSFASAVMLCLELWYFMVLIVF  
AGYLKNAQVSVDAMSICMNIldWTIMVSVGVNAAISVRVSNELGAAHPRTAKFSVVVAVI  
TSFICGLLLALLLMVSRNQYPTIFSIDTEVQNVVKDLTPVLAfSIVINNIQPTLSGVAIG  
AGWQAaVAYVNIACYYVFGIPLGLILGYKLNMGITGIWYGMLAGTVLQTAVIFWIVYRTN  
WNKEASLAGDRIKKWGG

>XP030496443.1

MEKENNQPLLSPYGEDELTHQNKHLLSRPFTAGARLLFTEFKTEFNKLWYLAAPAIFTAI  
CQYSLGAITQVFAGHVSTLALAAVSVENSVISGFSFGIMLGMGSALETLCGQAYGAGQYD  
MLGIYMQRSWLILNGTAVILCFFYIFAEQLLKLIGQTPEISESAGLFSVWMIPQLFAYAL  
NFPIAKFLQAQSKIMVMAVISAVALVFHVFFSWLVMLKLGWGMAGAAVVLNLSWWFIVVA  
QLAYIFSGSCGRAWSGFSWKAfQNLWGFVKLSFASAIMLCLEIWYFMALVLFAGYLKNAE  
VSVDVLSICANILGWAMMVAIGMNAAISVRVSNELGADHPRTAKVSLIVAVITSFLIGVV  
LSLILVITRNQYPSLFSDDTSVRILVTNLTPLLATCIVINNIQPVLSGVAIGAGWQAfVA  
YVNVACYLFGVPLGLSLGYKLNMGVSGIWYGMLAGTVLQTSILFLMVYTTNWSKEASLA  
EDRIRKWGGDSNEDIEKLVK

>XP030487796.1

MENSRRISSEQLLLQLHEPMLTMKSSPISSELEDTLSPNDIPFFQRLKSATSIELNTLFR  
LAGPTVVVYLLNNVTSMSTQIFCGHLGNLQLAaASLGNTGIQVFAYGLMLGMGSAVETLC  
GQAYGAHKYGMLGIYLQRSTILLMATGIPLTIYAFSKPILLGLGESEEIASAAALFVYG  
LIPQIFAYAA NFPIQKFLQAQSiVFPsAYISAGTLVVHLVLSWVLIYKLGWGLIGASLML  
SFSWWIVVVAQFVYILMSDKCKLTWNGFSLEAFSGLWEFFKLSIASAVMLCLETWYYQIL  
VLIAGLLKNAEIALDSLVCMTISGWVFMIAVGFNAaASVRVGNEIGAGHPKSASFVVI  
VTLSSFLISLVFAILVLVRHVISYAFTDGVTVANAVSDLTPFLAVSIILNGIQPVLSGV  
AVGCGWQAfVAYVNVGCYYIIGIPLGALLGFTFNLGAKGIWTGMICGTLIQTIILLWVTF  
RTDWNKEVEKAKTRLDKWSdq

>XP030491963.1

MGSHHQNEEELENHDDTDTTPLLISSIEQADQPPDHITPSAHSSDSRLEKILSDTELPLT

NRLWQASCIEFKLLFRLAAPAIFVYLINNSMSLSTRIYAGHLGNLELAASSLGNSGIQLF  
AYGLMLGMGSAVETLCCQAYGANRYDMLGIYLQQRATVVLTITGLPLTIVYVLSKPLLLWL  
GEPLELASAAALFVYGLIPQIFAYAVNFIQKFLQSQSIVTPSAYISAITLIFHLVACWA  
VAFELGFGIGISLVLSLSWIIIVGAQFGYILVSDKCKMTWNGFSVEAFSGLWEFFKLSG  
ASAVMLCLETWYFQVLVLITGLLDNPQLALDSIAVCMAINGLVFMVSVGFNAAASVRVSN  
ELGAGNAKSAAFAVKVVNLISFLIAVAEAILVLSLRHVISYAFTGGDTVAEAVSDLCPLF  
AVTLVLNGVQPVLSGVAVGCGWQAFVAYVNVGCYVVGVPPLGCLLGFKFDLGVKGIWSGM  
IGGTMMQTFILLWVTFRTDWNKEVDKAKSRLEKWGDKKQPLLNK

>XP030484940.1

MDSSANDVDNRRPLLQQPLLNDQYDSSSPQIILSSFGKGHHESSGQLETILSNTNVPFA  
QRFWPALKIELRLLFFLAAPAVIVYMINYLMSTMSTQIISGHLGNLELAASSLGNNGVQIF  
AYGLMLGMGSAVETLCCQAFGAQKYGMLGVYLQRSTILLTLTGILLTFVYIFSKRFLVFL  
GESERIASAAALFIYGLIPQIFAYAVNFIQKFLQAQSVAPSAYISAATLVVHVLSWV  
AVYKIGMGLLGASLVLSFSWIIIVAAQFIYIVKSERCKETWGGFSWEAFSGLPKFFKLSA  
ASAVMLCLETWYFQILVLLAGLLENPELALDSLICTTISGWVFMISVGFNAAASVRVSN  
ELGGANPKSAAFSVIVTVISFVISVIAAIVVLALRDVISYAFTDGETVAAAASDLCPLL  
SLTLLNGVQPVLSGVAVGCGWQTLVAYINVGSIYVVGIPLGVLGFIYFNLGAKGIWLG  
IGGTVLQTLILLWITFRTDWTKEVEESLKRLNKWDDQTNKKQILNT

>XP030508827.1

MGSNNNDNSKNGGELEERLLENEIEINEGDLKWRVWREMKLIWKIAFPSMLARTTSFGVL  
VVTQSFLGHVAELDLAAAFALVQTLFLRFINGIILGMSSATETLCCQAYGAKQYHMMGIYL  
QRSWIVNIITATITFPLFIFSTQILRALGEEEDIAVATGQISIWCIPYLYYFVFSFTIQM  
YLQAQLKNMVVGWLSASSFVLHVLLSWFFVYKLNWGVAGALGGLNIASWASVIGQFIYF  
GGWCPNSWKGFTTAAFSDMWPVVKLSVSSGLMLCLELWYNSILVLLAGYMKDATTASAF  
SICLNISAWEFMICLGLGAACVRVSNELGRGNAKAAKFAIKVIMGTSIVIGVISWILCL  
IFGRQISYIFTDEKVAADAVADLSVLLAFSILLNSIYPVLSGVAVGAGLQGTVAIVNIFC  
YYLIGIPLGVVLAYVINLEVKGGLWIGMLCGVLAQTITLSIITWKTWDWLQVRKASERLNR  
WFLKPDDLS

>XP030497193.1

MIEEEEVPLLKYQQEPRSEYLVRTWLESKKIWQIAGPSIFSRLAMFSVTIVTQSFAGHF  
SDVDLAAISVTTVIVGITFGFLGMSALETLCCQAYGGKKYHMMGIYMQRSWIVLFIS  
SVLLVPMFIFPAPIMKLIGQTEAVA EKTGLVAKWLIPFHLSPFQFSLQRFLQSQLKMAP  
IAWISGGVLGLHVLSWVVFYKMRVGLVGAALTIDFAWWLSVLGMLGYTVYGGCPETWTG  
LSSQAFVGLWDFIKLSLASGIMLSLENFYRMLVIVSGYFQNTTHIAVDALSICVTIYGWE  
SMIPLGFLAATGVRVANELGAGNAKGAKFATMISVFTSICVGLGFCLIVLLHEKLAMIF  
TSTLPVIKMNELAIMLVFSILFNCIQPVLSGVAVGSGWQSKAAAFVNMGSYYLVGVPLGV  
FFGWYLSLGIMGIWAGMLGGTIVQTVLLIITMRCEWEKEVQKAWMNIIKEAASNCNN

>XP030482625.1

MGDDEQQYQPLLLGLESHSRIPDLSSVAVEEFLEQRPVACRWWPRLVCWESRLWLWSGA  
SIIVSIFNYMLSFVTLMFTGHLGALELAGASIASVGIQGLAYGIMLGMASAVQTVCGQAY  
GAKQYSAMGIIQQRALILHLGA AFLLTFLYWFSGPILIGMGQSKSIAEQGQVFARGLIPQ  
IYAFALSCPMQRFLQAQNVNPLAFMSAAVFILHVLTWVAVYVLNYGLLGAALTLSLSW  
WLLAIVNGLYILFSPCKETWTGFSSKAFKGIWPYFKLTVSSAVMLCLEIWYSQGLVLIS  
GLLTNPTVSLDSISICMNYLNWDMQFMLGLSAAASVRVSNELGAGHPRVAKFSVFVSGT  
SILISIVFSAIVLIFKVGSLKLTFTDSEVIEAVSELTPLAISVFLNGIQPILSGVAIGS  
GWQGVAAYVNLTTYIIGLPIGCVLGFKTSLGVAGIWWGMIIGVLLQTLTLIILTARTNW  
HNEVAKAADRLKASANEENSNIISA

>XP030484051.1

MAAEDVDQSRLSLLRSSDPNYNDDDTKISDLSSEQVEEVLGKKPLPLRWWFRLVAVETRL  
LWLLSGATIAVSEFNMYLTFVTILFCGHLNALELAGASISSVGIQGLAYGIMLGMASAVQ  
TVCGQAYGSKQYKAMGIIQRAIVLHLGA AVLLTFLYWFSGPILIAIGQSQSIAEQGQVF  
ARGLIPQIYAFALTCPMQRFLQAQTIVNPLAYMSVGVFVHVFLSWIVVDVFGLLGAA  
LSLSFSWWLLVISNGLYILLSPTCNQWTGFSWKAFTGIWPYFKLTLSSAVMLCLEIWYN  
QGLVLISGLLSNPTLSLDSITICMNYLNWDICFMLGLGTSASVRVSNELGAANPKVAKFS  
VLVVNGNTIISLIFSIAIVLIFRVALSELFTSDTSIIEAVSNLTPLAISIFLNGIQPIL  
SGVAIGSGWQAVVAYVNLTAYYVIGLPIGCVLGFKTSLGVAGIWWGMIAGVFLQTVTLII  
LTAKTNWDSEVIKAAADRVRRTNETNLNFVVGV

>XP030497206.1

MASALETLCCQAYGGKKYHMMGIYMQRSWIVLFISSVLLVPMFIFPAPIMKLIGQTEAVA  
EKTGLVAKWLIPFHLSPFQFSLQRFLQSQLKMAPIAWISGGVLGLHVILSWVFVYKMRV  
GLVGAALTIDFAWWLSVLGMLGYTVYGGCPETWTGLSSQAFVGLWDFIKLSLASGIMLSL  
ENFYRMLVIVSGYFQNTTHIAVDALSICVTIYGWESMIPLGFLAATGVRVANELGAGNAK  
GAKFATMISVFTSICVGLGFCLIVLLHEKLA MIFTSTLPVIK MVNELAIMLVFSILFNC  
IQPVLSGVAVGSGWQSKAAAFVNMGSYYLVGVPLGVFFGWYLSLGIMGIWAGMLGGTIVQT  
VLLIITMRCEWEKEVQKAWMNIIEAASNCNN

>XP030484052.1

MAAEDVDQSRSLLRSSDPNYNDDDTKISDLSSEQVEEVLGKKPLPLRWVFRVAVWETRL  
LWLLSGATIAVSEFNMLTFVTIFCGHLNALELAGASISSVGIQGLAYGIMLGMAVAVQ  
TVCGQAYGSKQYKAMGIICQRAIVLHLGA AVLTLFLYWFGPILIAIGQSQSIAEQGQVF  
ARGLIPQIYAFALTCPMQRFLQAQTIVNPLAYIPTCNQWTGFSWKAFTGIWPYFKLTLS  
SAVMLCLEIWYNQGLVLISGLLSNPTLSLDSITICMNYLNWDICFMLGLGTSASVRVSNE  
LGAANPKVAKFSVLVVGNGTHIISLIFSAIVLIFRVALSELFTSDTSIIEAVSNLTPLLA  
ISIFLNGIQPILSGVAIGSGWQAVVAYVNLTAYYVIGLPIGCVLGFKTS LGVAGIWWGMI  
AGVFLQTVTLIILTAKTNWDSEVIKAADRVRRSTNETNLNFVVG

>XP030492740.1

MEKMYWREEQKQSLNSPLIQVCGETEVENGVRRKEIVEEVKKQLWLAGPLISVSLQFCL  
QMISVMFVGHGELTSLGASMATSFASVTGFSLLMGMASALDTLSCQSYGAKQYHMMGIL  
MQRAILVLVVVSIPLAVIWANTEPILVTLGQDPAIAAEAGKYAKFMIPSIFAYGLLQCLV  
RFLQTQNIWFPMVMVSSGMTTLIHILVCWVLVFKSGLGSRGAAMANSISYWINVLLALYV  
MYPSCAKTWTGFSKEALRNVA TFVRLAIPSAVMVCLEMWSFEMMVLLSGLLPNPTLETS  
VLSVSLNTASTVWMIPFGLSGAVSTRVSNELGAGRPDAARLAVCVVLVMAITEGLLIGLV  
FILVRNVWGYAYSNQVEVVKYVAAMMPILAISNFDGLQCVLSGTCRCGWQKIGAYVNL  
GSYYLVGIPSAVLMFVVLHVGGKGLWLGICALIVQVISLFTFTIKTDWEQEAKKATDRV  
YDSIVPVQLVS

>XP030492527.1

MSSNKVPLEDLKTQDNNNNDDYEELSLPCRVKIESKKLWHIVGPAIFSRIASYSMLVIT  
QAFAGHLGDLELA AISIANNVIVGDFGLLLGMSALETLCCQAYGAKKYYMLGVYMQRS  
WIVLSVCCVLLLPYLFATPVLVKLGQPHDVAELSGVAAMCMIPLHFSFAFQFPLQRFLQ  
SQLKTGVIAWVSLAALIMHIFISWLFVYQFKLG VIGTALTINFSWVTLVFGLLGYTLFGG  
CPTTWAGFSIEAFSGLWEFTKLSTSSGVMCLENWYRILILMTGNLKNAEIALDAL SIC  
MTINGWEMMIPLAFAAGTG

>XP030499345.1

MNTINQTMEEERSLLLKPHISSENHEIIHWKVFFEEVKKLGYLGGPLVIVVLSQYLLQVI  
SIMMVGHGELALSSAIA NSLSVVTGLSVLMGMASALETICGQAYGAKQYKKLGLQTYT  
SIFCLFLVCIPISLVWIFMGKILVFIGQDPQISHEAGKFIIWLIPALFAYAILQPLVRYF  
QTQSMITPMVITSFAILCFHIPLCWVLVFKFGMGNVGGAL AISISYWLNAIILGFYIKFS  
PLCEKTRTPISMFMFHGIGEFFRLAIPSAIMICLEWWSFELLILMSGILPNPQLETSVLS  
VCLQTISTLYAIPYGVGAASTRVSNELGAGNPQGARIATFAAMFLAIAETSIVTTTTLFM  
SRGIFGYTFSNEKEVVNYVTEMAPLVCLSVVLD SMQGVLSGIARGCGWQHIGAFINLGAF  
YLCGIPIAAAILGFWVNM RGKGLWIGIQSGALVQTTLALVTGCTNWEKQASMAKERLFGD  
TSKNGLEH

>XP030499346.1

MNTINQTMEEERSLLLKPHISSENHEIIHWKVFFEEVKKLGYLGGPLVIVVLSQYLLQVI  
SIMMVGHGELALSSAIA NSLSVVTGLSVLMGMASALETICGQAYGAKQYKKLGLQTYT  
SIFCLFLVCIPISLVWIFMGKILVFIGQDPQISHEAGKFIIWLIPALFAYAILQPLVRYF  
QTQSMITPMVITSFAILCFHIPLCWVLVFKFGMGNVGGAL AISISYWLNAIILGFYIKFS  
PLCEKTRTPISMFMFHGIGEFFRLAIPSAIMICLEWWSFELLILMSGILPNPQLETSVLS  
VCLQTISTLYAIPYGVGAASTRVSNELGAGNPQGARIATFAAMFLAIAETSIVTTTTLFM  
SRGIFGYTFSNEKEVVNYVTEMAPLVCLSVVLD SMQGVLSGIARGCGWQHIGAFINLGAF  
YLCGIPIAAAILGFWVNM RGKGLWIGIQSGALVQTTLALVTGCTNWEKQASMAKERLFGD  
TSKNGLED

>XP030499347.1

MEESLLLLHNSNHQEEDISKRNEIIHWKVFFEEVKKLGYLGGPLVIVVLSQYLLQVIMM  
MVGHGQLPLSSAIAISL SGVTGFSLLMGMSALETICGQAYGAKQYKKLGLQTYTSIF

CLFLVCIPISLVWIFMGKILVFIGQDPQISHEAGKFIIWLIPALFAYATLQPLIRYFQTQ  
SMITPMVITSFAILCFHIPLSWVLVFKFGLGNLGGALGIGISYWLNAVILGFYIKFSPLC  
EKTRAPISMEIFRGIKQFFRLAIPSAIMICLEWWSFELLILMSGILPNPQLETSVLSICL  
QTIATLYAIPYGVGA AVSTRVSNELGAGNPQGARIATFAAIFLAIAEMSIVTTTLFMSRS  
VFGYTFSNEKEVVSYVTDMAPLICLSIVLDSIQGIMSGIARGCGWQHIGAFINLGAFYLC  
GIPIAAILGFWANLRGKGLWIGIQSGAFLQTILLCLVTGFTNWEKQASNAKERLYGDGTK  
NVLVH

>XP030508962.1

MIYRQSSKNSIVLVMEENLKEEKNKWEISWRSLVREMKREGIIAGPMVGVAVLQYLLQVS  
SLIMVGHGLHLSIASVAIAISLTNVTGFSLLSGMAGGLETLCGQAFGAEQYHKLGTYYA  
AIISLSLICLPISVLWIFMDKFLFLVGQDPLISIEACHFSMCLIPGLFASAILKPLTRYC  
QTQSSILPMLLITLVVLVFHILTCWILIYKFEIGKNGAAISISLSTWLNVMMLGFYVTYS  
SVFEKTRISFSKEAFQGVGEFYRYGVPSAVMVCLKWWSCCELLILLSGLLPNPNLETSVLS  
ICLTISTLHFTISYGVGATTSTRVSNELGAGKPEARLAVWAAMFIAATEAVTVSISLFL  
CRSVGYAFTNEKQVVSIAIMAPLICLSVFMDSLQAVLSGVARGSGWQRMGAYINLGAF  
YVAGLPMGIVLGAFHLHLKGLWIGIVIGSVVQSTLLFLVTIFSNWKKQAIKARERAIST  
LAEH

>XP030499344.1

MTMEESLLLKNNVHEEQORDINGDIEIENKIVVTLWNWKVFFEEVKRLGFLGGPLVIVVLS  
QFLLQVISIMMVGHGLGELALSSSAIAISLSGVTGFSVLMGMASGLETICGQAYGAKQYKK  
LGLQTYTAIFCLFLVCIPISLIWIFMGKILVFIGQDPQISHEAGKFIIWLIPALFAYAIL  
QPLIRYFQTQSMITPMLITSFAILCFHIPLSWVLVFKFGLGNLGGALGIGISYWLNAIIF  
GFYIKFSPCEKTRTSISIEIFHGIREFFRLAIPSAVMSCLEWWSFELLILMSGILPNPQ  
LETSVLSICLQTISTLYAIPFGVGA AASTRVANELGAGNPQGARIATFAAMFIAIVETSI  
VTTTLFMCRDVFGYTFSNEKEVVSYVTEMAPLLCLSVLDSMQGNLSGIARGCGWQHIGA  
FINLGAFYLCGPIGVILGFWANLRGKGLWIGIQISFVQIILLSFVTGCTNWEKQASMA  
KERLFGDTSKNGLED

>XP030509465.1

MEEALLLVPEDKGCCGLGKEIKLSYIAAPMVVSVSQNLLQVVSVMAGHLGELSLSGV  
AIASSFTNVTGFSLLFGMAGGLETLCGQAYGAEQYKKLGSYTYCSIIISLIFVCFPVSLW  
MFVEKILIMMGQDPLVSSEAGKYSIWLLPALLAYAILQSLIRYFLTQGLILPMLLSSCAT  
LCFHVPLCWALVYKFELGTTGAALSIGFSYWLTVIFLVIYIQYSSACDKTRVSFSLDVFR  
SIPFEFFRFGPSAVMSCLEWWSFELLILFSGLLPNSKLETSVLSICLTTMSLHYFIPYGV  
GAAASTRVSNELGAGNPRGAKAAVLAATMIAAVEAISVSTILFSCRVLGYAYSNEKEIV  
DYVTRITPLLSFSVIMDSVQAVFSGVARGTGSQRLAAFVNLGAYYLVGLPLALVLCFMLQ  
LRGMGLWAGILAGTTTQALFYALITSFTNWQKKA VEARERIFEGTNVGESVFA

>XP030498726.1

MDEKGENMEKGLLEKEKEKESIFSKVFDEVKLLGYIGGPMVIVNMSQYVLQIISIMMVGH  
HGKLALSSTAIAISFSAVSGFSLIFGMSSALETLCGQAYGAKQYRKLGLTNTGILTTL  
VCIPLSLMWSYMEENVLFVMGQDPIISREAGKFSIWLPALFAYATLQPLVRYFMTQSITY  
PLLLSSCASICCHLPICWALVFKSRLGHFGAALSIGFSYWLNVSLLLLFMKFSPACEKTR  
ASIFSNLFQGVAEFLRFIPSSLMICLEWWAFELLTLLSGFLSNPQLETSVLSVCLSTVI  
TLTYTIPDGFGAAISTRVSNELGAGKPRAAQFAVRVILCLVAIEAVIVSSSLFLGRNTFGY  
VFSNEKEVVHYVTSMAPLVCATLILNSLQGVLSGIIRGCGWQDLGAFVNLSYFFGIPA  
AAALGFWLKMARGKGLWIGICSGCFLQIILLSIITFFINWEDKANLARKRVFKKRSIEDNG  
LSEHNNSLY

>XP030498725.1

MEEKREISMEKGLLEKEKEKESIFSKIFDEVKLLGYIGGPMVIVNISQYFLQIVSVMVG  
HHGKLALSSTAIAISFSAVSGFSLILGMSSALETLCGQAYGAKQYRKLGLTNTGILTTL  
LVSIPLSLMWFYMEKILVFMGQDPIISREAGKFSIWLPALFAYATLQPLVRYFMTQSIT  
YPLLLSSFASICCHLPICWALVFKSRLGHFGAALSIGFSYWLNVSLLLLFMKFSPTCEKT  
RASIFSNLFQGVGEFLRFAIPSSLMICLEWWAFELLTLLSGFLSNPQLETSVLSVCLSTI  
ITLYTIPDGFGAATSTRVSNELGAGKPKAARFVVRVVLCLVVEAVIVSSSLFLGRKTFG  
YVFSNDKEVVDDYVTSMAPLVCAAVMINSLQAILSGIIRGCGWQDLGAFINLSYFFGIP  
TAATLGFWLKMARGKGLWIGICCGCFLQMILLSIITFFINWEEKAKLARERVFKKRSLEDN  
VLSEHDNSNLY

>XP030508611.1

MEADHEDEVPLLVKRGKSSELLGGVREGRFVGEMKKMIAIGMPMVVVTVAAQFLPQVVST  
MMAGHLGELSLSGAAIATSFADVTGFCLLLGMAGALETLCGQTYGAEYHKLGEYTWCAI  
ISLTFICLPISLLWIYMDRVLWVVGQDPLISQAAAQYSTCLIPALFGYAVLQSLVRFFQS  
QRLILPMLISSCSVLCLHIPLCWILVFKLHLGISGAAFSIGGSYWLNVVFLGLYMKYSSA  
CEKTRIKFSMEAFRHIREFMRLAIPSAMLCLEYASFELLVFLSGLFPNAKLEASVLSIC  
ITTTTSIFYIPYGIGAATSTQVSNRLGAGNAEGAKPAIKSALVLGVAEAFLGSTILFCCR  
NVLGAYAYSNEIEVVNYVKEMVPLLSFSIGVDSLAVLSGVARGSGWQDIGAYVNLGAYYV  
VGIPLAALLGFVFKLRGKGLWIGIMTGTTLQALFFLVITVSTNWQNQA EKARERIFKENE  
TLINHSVPEYYVEEQKTLIC

>XP030496616.1

MGESLMRKQEEEEQNLEKGLLENEKREEKVEFFRDFIEELKLLGYIAGPMVAVNLSLYFLQ  
IISLMMVGHLGKLYLSSTAIAISIGAVSGFSFLFGMSGALETLGQAYGAKQYRKLGTQT  
NTAILCLILVCIPLSLVWFYMENILILIGQDPHIXREAGQFLLWLIPALFAYATLQPLIR  
YFQSQSLIKPLLVSVCVSI CCHVPLCWTLVFKCGLQHCGAAISIGISYWLNVILLVLYMT  
FSSSCKSTRVPISPFLFQGFGEFFRFAIPSAAMSCLEWWSFEIITLLSGLLPNPQLETSV  
LSVCMSTIATLYTIPEGLGSAGSTRVSNELGAGKPRAARLAVGAVMFLSVSESIIVSSAL  
FAGRKAFGYFFSNDKEVVVDYAMNMAPLVCLSVIFDSLHATLSGIARGCGWQDLGAFVNLG  
AYYLVGIPVAAALGFWFDLRGKGLWIGIVVGSFLQAFLLSLIAVCTNWDEKAKMARKRIF  
EDSTTSL

>XP030499266.1

MGESLIWKQEDENLEKGLLENEKREEKVEFFRDFIKELKLLGYIAGPMVAVNLSLYFLQ  
IISLMMVGHLGKLYLSSTAV AISIGAVSGFSLLFGMSGALETLGQAYGAKQYRKLGTQT  
NTAILCLILVCIPLSLIWFYMENILIVIGQNPNISRQAGQFLLWLIPALFAYATLQPLIR  
YFQSQSLIKPLLVSVCVSI SCHVPLCWTLVFKCGLQHCGAAISIGISYWLNVILLLLYMT  
FSSSCESTRVPISSELFQGCGEFFRLAIPSAAMSCLEWWSFEIITLLSGLLSNPQLETSV  
LSVCMSTISTLYTIPEGLGSAGSTRVSNELGAGKPRAARLAVGAVMFLSVSESIIVSSAL  
FAGRKAFGYFFTNDKEVVVDYAMNMAPLVCLSVIFDSLHATLSGIARGCGWQDLGAYVNLG  
AYYLVGIPVAAALGFRFDLRGKGLWIGIIIGSFLQAFLLSLIAICTNWNEKAKMARKRMF  
EEIFEESTTSLV

>XP030486933.1

MAGNSDAREPLIEVEEIEVSRRKWWDRLLDAQEAKQQVLFSLPMITNGFYLIPLVSVM  
FAGHLGQLNLAGATLANSWATVTGYAFMIGLSGALETLCGQGFGAKSFKLLGIHLQTACI  
TSTLFSIIISFLWFFTEPLLIFLHQEHQIAETAGLYTKFLIPSIFAFGYIQNILRFLQTQ  
SVVRPLVLFSSIPLVFHIGITYCLVHLTPLGFKGAPLATSVTLWL TFLMLAAYVMFSKEF  
KLTWQGSLESFSYILTNLKLALPSATMVCLEYWAFEIMVFLAGLMPNSEVTTSIAMCV  
NTESIAYSILYGLSAASTRVSNELGADRPDKAKNAMIVTLKLCGLLGFVLVLALGFGHN  
IWAGLFSDDIISFASMTPLLAISIIVDSFQGVLSGVARGCGWQHMMVVYVNLATFYFI  
GMTVAAILGFKFEFYAKGLWIGLICGLSCQAVTLMVITMRAQWTKLQ LSEDKSEKEYSIS  
A

>XP030488163.1

MEGISSSISNRNIVAALPRDLSGTAGSSSDGGEERGNVIVNITSTSSGEKWWKKVLEVE  
EAKQQVLFSLPLILTNGFYLIPLISVMFASHLGPLQLAGATLANSWATVTGYAFLIGLS  
GALETLCGQGFGANLYKMMGIHLQASCITSFLFSILISFVWFNTEPILVFLGQDLEIAET  
AGIYTKFLIPSIFAFGYIQNILRFLQTQSVVRPAVLLSAIPLVFHIGITYCLVHLTPLGF  
KGAPIATSITLWISFFMLAAYVLLARQFNLTWQGFSTESFSYILTNLKLSLPSAAMVCLE  
YWAFEILVFLAGLMPNSKSTTSLIAICVNTETIAYNVTYGLSASASTRVSNELGGGHPEQ  
AKSAMVVSLLKSLVLLATIVVMALGFGHNFAGLFTDNSAIKSFASMTPLLAISIMLDSL  
QGVLSGVARGCGWQRMVVYVNLITFYLVGVTVGSLLAFKMKLYVKGLWIGLICGLACQAA  
TLVLITMCTNWHMIAAVV

>XP030509466.1

MEEALLVPEDKGCCGLGKEIKKLSYIAAPMVVSVSQNLLQVVSVM MAGHLGELSLSGV  
AIASSFTNVTGFSLLFGMAGGLETLCGQAYGAEQYKKLGSYTYCSIIISLIFVCFPVSLW  
MFVEKILIMMGQDPLVSSEAGKYSIWLLPALLAYAILQSLIRYFLTQGLILPMLSSCAT  
LCFHVPLCWALYSSACDKTRVSFSLDVFRSIEFFRFGFPSAVMSCLEWWSFELLILFSG  
LLPNSKLETSVLSICLTTMSLHYFIPYGVGAASTRVSNELGAGNPRGAKAAVLAATMIA  
AVEAISVSTILFSCRSLGYAYSNEKEIVDYVTRITPLLSFVIMDSVQAVFSGVARGTG  
SQRLAAFVNLGAYYLVGLPLALVLCFMLQLRGMGLWAGILAGTTTQALFYALITSFTNWQ

KKAVEARERIFEGTNVGESVFA

>XP030488086.1

MENS DVREPLIEVEGNE VIRGKWWNRVLD ADEAKQQVLFSLPMITNGFYLIPLISVMF  
AGHLGQLHLAGATLANSWATVSGYAFMVGLSGALETLCGQGFGAKSFKLLGIHLQTACIT  
STIFSIIISFIWFFTEQLLLFLRQDPQIAETAGLYTKFLIPSIFAYGYIQNILRFLQTQS  
VVRPLILFSSIPLVFHIGITYCLVHLTPLGFKGAPLATSITLWLTFFLLVAYVMFSKEFK  
LTWHGFSLESFCYIYTNLKLAIPSAAMVCLEYWAFEILVFLAGLMPNSEVTTSLIAICVN  
TEAITFNFTYGLSAAASTRVSNELGAGRPDRAKSAMIVTLKLCGVLALILVLALGFGHNI  
WAGLFSDSSEIISFASLTPLLAISIVIDSLQGVLSGVARGCGWQQTAVYVNLGTFYFIG  
MTVAAILAFKFELYVKGLWIGMTCGMLCQAFALMLITMCTQWTKLQLPEEKPKKGDSILA

>XP030487456.1

MAGNSEAREALIEVEEGEVINRGKWWDRVLD AEEAKQQVLFSLPMILTNGFYLIPLISV  
MFAGHLGHLHLAGATLANSWATVSGYAFMIGLSGALETLCGQGFGAKSFKLLGIHLQTAC  
ITTTLSFIISFLWFFTEQLLIFLRQDPQIAEAAGLYTKFLIPSIFAYGYIQNMLRFLQT  
QSVVRPAVLLSAIPLVLHIGITYCLVHLTPLGFVGAPLATSITLWLSFFMLVAYVMFSKE  
FNLTWQGFSLSESFYILTNLKLALPSATMVCLEYWAFEILVFLAGLMPNSEVTTSLIAIC  
VNTEAIAYNFTYGLSAAASTRVSNELGADRPDKAKSAMIVSLKLCGVFALILALGFGH  
NIWAGTYSDDSDIISFASMTPLLAISMTVDSFQGVLSGVARGCGWQHIVVYNLATYYI  
VGMTVAAILAFKFELYVKVLAM

>XP030502200.1

MILTGLLLYSRSMISMLFLGRLGELALAGGSLAVGFANITGYSILSGLAMGMEPICGQAF  
GAKKNTLLGLCLQRTILLMLTSIPISLLWLNMMKILILCGQDEAIAEQAQSYLLYSLPD  
LLAQSLHLPLRIYLRQTSITLPLTYCATFSIFLHIPINYFFVSHLNWGIKGVALSGLVTN  
FNLVASLILYLVS GAHKKTWGGISTDCFKDWKTLNLAIPSCISVCLEWWWYEMILLC  
GLLINPRATVASMGIQTTALIIYFPSSLSFSVSTRVGNELGANKPKKARFAAIVGLSC  
SFALGLVALVFAVMVRKVWATMFTQDKDIISLTSVLPIIGLCELGNCPQTTGCGVLRGT  
ARPKVGANINLGC FYMVGMPVALVLSFFAGDFKGLWLGLLAAQGCCALTMLVVLGQTDW  
NSEAQRAKLLTGAQIIDHGDDDDDHGDDDDSELVDEEKPNEKSVLVKGDGLYTTLCDCKNN  
SPV

>XP030495219.1

MCHPKPSSPLSSFLCFKTALLMNHHRKPVDPHYPEDQHELHRWPTPSEVLEE VKAIGKISG  
PTALTGLLLYSRAMISMLFLGYLGELQLAGGSLAIGFANITGYSVISGLAMGMEPICGQA  
YGAKQWKLLGLTLQRTVLLLLSTSIPIFMWLNMMKNILLCCGQDHEISSMAHTFILFSPV  
DLCFLSLLHPLRIYLRQTSITLPLTYCTAISVLLHVPLNFILVVKLQMGISGVAIAMVWT  
NLHQFLLGGFVYFSGVYKDSWVSPSIDCLRGWSSLLSMAVPTCISVCLEWWWYEFMILL  
CGLLGNPKATVASMGIQTTSLVYVFPSSLSQGVSTRVSHELGANRPGKARISMIVSMA  
LAVFAGLTAMIFTTSMRYQWGRLFTDDAEILKLTALPIVGLCELGNCPQTTGCGVLRG  
SARPTVGANINLGSFYLVGMPVAVFIGFFLKLGFPLWLGLLAAQGCCALLMIYVLCTTD  
WRLQVERAINLTKDEQYCDDDTRSTNYNNNNNNNNKNENIEGPLETISSSTSAPDD  
SMIIRERNHNKRGTDNLEEIVVCINDNDDDGDEDDDLPFNSTESPETYPLLSQATRT

>XP030500350.1

MCHHSSSPSSCLDYDSNPKVLSVTVQDSNERTPLINSKTTDLLESQTQNSQRSHLSEA  
VSEAKCIANIALPMVLTGLLLYSRSLISMLFLGRLGELSLAGGSLAIGFANITGYSVLSG  
LAMGMEPICGQAFGAKRFKLLGLTLQRTVILLTSLPIAILWLNMRILLCCGQQDDIA  
TEAQSYIFFSLPDLIAQSILHPLRVYLRQTSITLPLTFCATLSIILHIPINYFLVSVLNL  
GIKGVALS GVWTFNLVGLSIVYVVISGVYKKTWVEISSDCLRAWKSLLSLAIPSCISVC  
LEWWWYEFMILLCGLLNPQATVASMGIQTTALMIYFPSSLSFGVSTRVGNELGANNP  
QRAKLAAIVGLLYSSVLGLSALLFAVMVRNIWAKMFTQDVEIIALTSMLVPIIGLCELGN  
CPQTTGCGVLRGTARPSFGANINLGC FYLVGMPVAIWLSFYVGDFDTGLWLGLLAAQSSC  
VVTMLVVLARTNWEIQAQRAKELTGSHTLEEVDHHDHNDNYDDDEVKDSFCSLHFAESD  
DHSSNNNNNSQV

>XP030488326.1

MEQKHQDFSFTKFP TLSQIIQELKQLWSLALPITGMNLLVFYRAAVSVFFLGQLGRLELA  
GGTSLGFTNITGYSVLMGLATGLEPVCSQAYGTKNQPLLAISFQRMVLILTASIPITL  
LWLNLEKIMISMGQNREITSMAATYCFYSLPDLFTNSLLQPLRVFLRSQEAVKPMMYCTM  
AAVFLHAPLNVVMVKMGLGVGGVAAASVMTNLNMVLLMGGWYLGWGGGWEMVRLFGGFK  
EVCMGIGGLRLAVPSCLCICLEWWWYIEIVTVLAGYLDNPTLAVAATGILIQTTSMMYTL



PLALSGCVSTRVGNELGAGNPYKAKLAAMVALGCAFLIGFINVTWTVILRERWAGLFTKD  
DLVMALVASVMPIMGLCELGNCPQTTGCGILRGTPVVGARVNLGSFYFVGTPVAVGLA  
FWLKIGFPLWFLGMSAQLACVVSILYVLLHTDWEAEALKAQKLAGVEMSTSACIEEGE  
TKYEEDEESKGLLITNGNGNHKDDVFWTE  
>XP030487307.1  
MCNPTTNTCTSSTTTKEHNIKEPQTHLFLDLLSLNTNIKDQEKTTSAKPDDDHYQQP  
NSFTSDIIEAKSLFNLGFPIALTALILYSRSIISMLFLGHLGDFQLAAGALAIAFANIT  
GYSVLSGLALGMEPLCSQAFAQRPKLLSITLHRSIIFLLVSSLPIFLWLNMSRILFCL  
NQDPSITTMAHTYLLFSLPDLFTNSFIHPIRIYLRSQGITVPLTLASLAGTLLHFPLNFL  
LVTRLKLGAVGAAASSAVNLFVLLCLVSYVWWDGSLLEPAWSAPSRECLSGWKPLRLA  
APSCVSVCLEWWWYEMIVLCGFLADPKSTVASMGVLIQTTSLIYVFPSSLGFAVSTRVG  
NELGANRPYRAKLSAVVAVLLAFVTGLSAMSFAVGMDTWGRMFTSDAEILRLTSAALPI  
LGLCELGNCPQTVGCGVLRGSARPCTAANVNVSFAFYLVGMPVAIGLSFWVGIGFCGLWMG  
LLAAQICCAGLMLYVVGTTDWNFEAKRAQMLTCASCEDNILPSIDCKDDEEQPLICIVVT  
SSK  
>XP030508430.1  
MVPQVEPENNKVQKYPTMPEVVEELKKVSNIGFPILTMSLVNYLRNMAMVICMGRGSL  
LAGGALAIGFTNITGYSLLSGLAMGMDPLCSQAIGSQNHALAFLTLQRTIFILLFASLPI  
SLLWFNLQPLMLILNQNPDIKTIATYCKFAIPDLLANSLLHPLRIFLRKSITWPLMWS  
NLLAMFLHIPITIFLTKLSLGVQGIASNFITNFTLFLLLLYLYFNTNFNKESYYSNS  
NFTTNLKTPLPKSWPTFTNSTWEGWGVLRSLSIQSCLAVCLEWWWYEFMTLLAGYLPN  
PKVALATSAIVIQTSLMYTIPSALSASVSTRVGNELGAERPEKAKLAASVAVSLALITS  
LVGLVGTTFGRGAWGRVYTHDNEILELTMAVLPPIGVCELANCPQTTSCGILRGCARPGI  
GAAINFYAFYLVGAPVAVVLGFVWKLGLGLCYGLLAAQIACVVSILTVVYNTNWEKELE  
KAKDLMMIKDITVDNVHHNHDDYDNHSHGHHDHITVLLQ  
>XP030480622.1  
MCPNSSDESQTIINGSLDEPLLPKQNGINMRPLVVEGGGDDGGGGGGVGGGAATRFLOGL  
QRFFPANSLLRTLPLNEVSEELKSLVKIAWPIIMTLLIYSRSIVSMLFLGRGKTELAG  
GSLALGFGNITGNSILRGLSTGMDPICCAQAYGAKRFSVLSHAFQKTFCLLLVSIPISAL  
WLNMEPICIWLGQDPATIRVAKIYMAFSVPELLAQAHHLPLRIFLRTQGLTFPLTVAATC  
SAILHLPINYFLVFHLKLGAVGVALALAWNTVNLNLGLLIYILFSNKPLKPWTGLTIFST  
FQGWGPLLKLALPSCAAVCLEWWWYEMMFLCGILKNPQASLASMGIQTGLLYVFPI  
SLSAGLTTRVGHALGSGQPVRQAQWTAIAGLAFAGFGLLALVLMIMVRSWWGRLYTDEPQ  
VLDLLSKALPILGLCELGNTPQTAACGVNLGMARPNLGARINLCAFYGVGLPVAVLVTFK  
FRYGLGLWIGLLSAQISCLGMMVYVLVQTDWKHQSKRAEEMVSGTDEENQKNPEK  
>XP030495192.1  
MVCKYEWGSSGA AVATSISYCVNAFLALFIKFSSTCKETWNGFSKQALHNFLPYMKLAL  
PSVLMCEFKTWAFEILIFSGFFPNPVLETSVQSICLNTFGLIWSIPAGLMVSASVRVGN  
EIGAKNLEAARLAMVVSIVIIIEGLVVGISILLRKMWAGLYSNDENVVKIVSSLMPFL  
AMSCFLNGFQTVLSGIFKCGWQNKGVYLNLAIFYFVGIPCQVTFVFLHMKSKGLWLGM  
IIGFVNVIFFLMILRANWDKEVMKAENRVKECSTYGEKSSGQNNSS  
>XP030498085.1  
MHVISTHPLLSPLYGKEGYGIIGDHSKRIQDTLSKVLEEMKELYVIAIPMIMAGLLVYGK  
SLISLFFMGMGIKDALTGGS LAICVANITGYSVVSGLAAGMEGISSQAYGANKWSLMGQT  
LNRTILMILTATFPIFSWFNSKPLFLYWFNNNQTLSTIATTYLKYSIPSLILQSFNP  
LRIHLRTQKLTKPLMLSAALALASHAPINYFINHLGFNNIGAVALSASLTDNLNIFVSLA  
FYLYFFGTMRWSWPEWSFRNCFLEWKPILSQAIPSCISVCLEWWWYELMIMLSGLLVNSG  
DAVACMGILMQATMLVYQFPFALNQAASTRVGIELGANQPKAKTAAAFVALSCGFVTGIV  
SLVFMVAVKDTWGKIFTKDRILSLSAAVLPVVGLECVGNCPQTTVCGLVLRGSGRASMGA  
CINVGsfygvGFPVAMFVGFKMGKGLIGLWVGLVGAQLVCACVMVVVLVTTDWNVQAERA  
KELTRSTSNDVDDGLISLVLEN

Previously described flavonoid transporter belonging to MATEs were included according to [35]: *Arabidopsis thaliana* FFT, (AT4G25640.2) and AtTT12 (AT3G59030.1); *Vitis vinifera* VvanthoMATE1, (NP\_001290007.1) and VvanthoMATE3 (NP\_001268037.1); *Medicago truncatula* MtMATE1, (XP\_003592215.2) and MtMATE2 (; *Solanum lycopersicum* MTP77 (Soly03g025220.2.1).

>SIMTP77

METPLLNGYSGGERNDLIGADGDYRPAKSTKDWWAIFCVETLKLWRIGGPFAFNIIICQY  
GVNSLTNIFVGHGLGNVELSAISIAQTVISTFSFGFMMMGMSALETLCGQAYGAGQVHMLG  
VYMQRSIIILLATCVFLLPIYLFTHPLLVLGQETAIAADLSGRYTMLLIPQLFSLAINFP  
TSKFLQAQSKVDVLGIGFAAVLVHALFLWLFYITLEWGTNGAAIAFDLTNWLTAMAQLA  
YVVGWCKDGLWGLSWSAFNEIWAFFVRLSIASAVMLCLEIWMMSIILLVGHLLNNAVIAVG  
SISICMNINGWESMLFIGINA AISIRVSNELGQGHPRATKYSVYITVFQSLIGILCMVI  
VLVARDHLAIIFSNSKEMQEAVADLAYLLGITMVLNSVQPVISGVAVGGGWQALVAYINL  
GCYYVFLPLGYLLGYVAKLGTKGLWLGMIAGAALQTLILLIYKTNWNKEVNDTTERM  
RKWGGQDFETQKSADGQLTIENGGVA

>AtTT12

MSSTETIEPLLTRLHSDSQITERSSPEIEEFLRRRGSTVTPRWLKLAVWESKLLWTLG  
ASIVSVLNYMLSFVTVMFTGHLGSLQLAGASIA TVGIQGLAYGIMLGMA SAVQTVCGQA  
YGARQYSSMGIIICQRAMVLHLAAAVFLTFLYWYSGPILKTMGQSV AIAHEGQIFARGMIP  
QIYAFALACPMQRFQAQNVNPLAYMSLGVFLLHTLLTWLVNTNVLDFGLLGAALILSFS  
WWLLVAVNGMYILMSPNCKETWTGFSTRAFRGIWPYFKLTVASAVMLCLEIWMYNOGLVII  
SGLLSNPTISLDAISICMYILNWDQMQLGLSAAISVRVSNELGAGNPRVAMLSVVVNI  
TTVLISSVLCVIVLVFRVGLSKAFTSDAEVIAAVSDLFLLAVSIFLNGIQPILSGVAIG  
SGWQAVVAYVNLVTYYVIGLPIGCVLGFKTS LGVAGIWWGMIAGVILQTLTLIVLTLKTN  
WTSEVENAAQRVKTSATENQEMANAGV

>VvanthoMATE1

METPLLKSGAERGYGGEGGDYPLTTWREVRSMWLWRETVKVWRVAGPLAFQILCQFGTNL  
VTTVFVGHIGNLELSAVSISVSVIGTFSFGFMLGMGSALETLCGQAYGAGQVQLLGVYLQ  
RSWIILLVSCIILLPIYIFATPILKALGQEDEIADLAGQFTLETIPQLFSLAIIPTQKF  
LQAQSKVNVQATICFVALILDIGMLAVFIFVFGWGTTGAAIAYDISSWVTAVAQVVYAIS  
WCKEGWTGLTWSAFREIWAFFVRLSLASAVMLCLEIWMYFMIIILLTGHLQNAVIAVGSLSI  
CMTFGGLEVVFMFMGMNAAVSIRVSNELGYGHPRAAKYSVFVAVSQSLIGIFCMVVVLLA  
RDYIAIIFTTNKEMQEAVSHLAYLLGVTMLLNSLPVFSGVAVGGGWQAMVAYINLGCYY  
IIGIPLGYLLGYKAKLGVQGLWGGMICGTALQTLVLLFIVYRTNWNREVEQTTERMQKWG  
GQRIEADDV

>VvanthoMATE3

METPLLNSGAEEGYSGPDGDYQPLRSWREVRSMVWKETVKLWRVAGPLAFQILCQFGTNS  
MTSVFVGHIGNLQLSAVSISVSVIGTFSFGFMLGMGSALETLCGQAYGAGQVHLLGVYLQ  
RSWIILLVTCVILSPVYVFATPILKVLGQEDAIADLAGQFTIETIPQLFSLAIIPTQKF  
LQAQSKVNVQATIAFVALILHIGMLSVFIFVFGWGTTGAAIAYDISNWVIAVSQVVYAIG  
WCKEGWTGLTWSAFREIWAFFVRLSIASAVMLCLEIWMYFTIIVLLTGHLQNAVIAVGSLSI  
CMTFNGWEGMLFIGMNAALSIRVSNELGYGHPRAAKFSVYVAVSQSLIGILCMVVVLLA  
RDYIAFIFTSNKEMQEAVSNLAYLLGATMLLNSMQPVLSGVAVGSGWQALVAYINLGCYY  
IIGVPLGCLLGYLAKFGVKGLWGGMICGTALQTLILLFIVYRTNWNKEVEQTTERMQKWG  
GVQIETKKTSDDV

>MtMATE2

MDSHTPLLNTTAATSSSSELLELDGGDYLEVKGFKQARKVFAIETLRIWKIALPIVFNIL  
CQYGVNSITNIFVGHGLGDIQLSAISLINSVIGTFAGFMLGMGSATETLCGQAFGAGQVH  
MLGVYMQRSWIILFVTSIILLPIYIFAAPILKLLGQQEDMADLAGSFALLVIPQFLSLSF  
NFPTQKFLQSQSKVNVIWIGLVALIVHIGLLWLLIYVLDLGLTGAAIAFDVTSWGITLA  
QLVYVVIWCKDCWNGLSWLALKDIWAFFVRLSVASAVMLCLEIWMMSLIVLAGHLDNAVI  
AVDSISICMNFNGWEGMIFIGVNA AISVRVSNELGLRHPRAAKYSVYVTVFQSLFMGIFF  
MGVILVTKDYFAIVFTNSKTLQVAVADLGNLLAVTMVLNSVQPVISGVAVGSGWQALVAY  
INVGCYYLFGPLGYILGNVAELGVKGLWGGMICGILLQTLLLSGILYKTNWNKEVDNTS  
ARVQQWGGQTVEVDSNGVDKP

>AtFFT

MDPTAPLLTHGGEVEEDYAPARSWTDVKRVLSTESAKLWMIAAPVGFNIIICQYGVSSVT-  
NIFVGHIGEVELSAVSISLSVIGTFSFGFLGMGSALETLCGQAYGAGQVNMGLGVYMQRSWIILFVSCFFLLPIYIFATPVLRLGQ  
AEEIAPAGQFTLLTIPQLFSLAFNFPTSKFLQAQSKVVAIAWIGFVALSLHVIMLWL-  
FIIIEFGWGTNGAALAFNITNWGTAAIAQIVYVIGWCNEGWTGLSWLAFKEIWAFFVRLSIASAVMLCLEIWMMSIIVLTGRLDNA

VIAVDSLICMNINGLEAMLFIGNAAIS-  
VRVSNELGLGRPRAAKYSVYVTVFQSLIGLVFMVAIIIARDHFAIIFTSSKVLQRAVSKLAYLLGITMVLNSVQPVVSGVAVGGG  
WQGLVAYINLGCYYIFGLPFGYLLGYIANFGVMGLWSGMIAGTALQTLLLI-  
VLYKTNWNKEVEETMERMKKWGGSETTSKDILASGWPSGLRRQTQVLVFVRGRGFKPHF
